# Supplementary material
Source: MDPI journal article supplement (https://www.mdpi.com/2073-445X/12/4/757)
Supplement: s1 [file s1]

Table S1 Coordinates of meteorological stations

| Name              | Abbreviation | Coordinates |          |
|-------------------|--------------|-------------|----------|
|                   |              | X           | Y        |
| Skalica           | SI           | -562154     | -1207323 |
| Senica            | SE           | -545837     | -1222658 |
| Myjava            | MY           | -533676     | -1216631 |
| Bratislava        | BA           | -566593     | -1278462 |
| Senec             | SC           | -560752     | -1275878 |
| Trnava            | TT           | -528463     | -1246971 |
| Dunajská streda   | DS           | -517124     | -1294517 |
| Pezinok           | PE           | -558759     | -1256614 |
| Malacky           | MA           | -577077     | -1231574 |
| Šaľa a Nové zámky | SA/NZ        | -482831     | -1293381 |
| Nitra             | NR           | -496256     | -1272908 |
| Komárno           | KM           | -495823     | -1318398 |

Table S2 SPI for meteorological stations (1961–2019)

| Year/Station | TT    | BA    | DS    | KM    | SA/NZ | SC    | MY    | SE    | NR    | PE  | SI  | MA  |
|--------------|-------|-------|-------|-------|-------|-------|-------|-------|-------|-----|-----|-----|
| 1961         | 0,69  | -0,43 | -0,64 | 0,07  | -0,44 | 0,28  | 0,29  | N/A   | N/A   | N/A | N/A | N/A |
| 1962         | 0,27  | -0,35 | -1,13 | -0,47 | 0,44  | 0,33  | 0,14  | N/A   | N/A   | N/A | N/A | N/A |
| 1963         | -0,35 | 0,23  | 0,39  | 0,39  | -0,13 | 0,01  | -0,34 | N/A   | N/A   | N/A | N/A | N/A |
| 1964         | 0,1   | -0,21 | -0,19 | -0,18 | 0,06  | -0,22 | 0,05  | -1,45 | N/A   | N/A | N/A | N/A |
| 1965         | 1,82  | 2,57  | 0,93  | 2,3   | 1,25  | 1,84  | 0,84  | 0,8   | N/A   | N/A | N/A | N/A |
| 1966         | 2,21  | 2,17  | 1,97  | 1,64  | 1,14  | 2,2   | 1,04  | 2     | N/A   | N/A | N/A | N/A |
| 1967         | -1,07 | 0,46  | -1,21 | -1,33 | -1,06 | -1,06 | -0,33 | 0,11  | N/A   | N/A | N/A | N/A |
| 1968         | -0,29 | 0,43  | -0,89 | -0,54 | -1    | -0,96 | -0,01 | -0,44 | N/A   | N/A | N/A | N/A |
| 1969         | -0,61 | 1,23  | -0,22 | -0,78 | -0,21 | -0,12 | -0,64 | -0,08 | N/A   | N/A | N/A | N/A |
| 1970         | 0,25  | 0,85  | 0,33  | -0,41 | 0,29  | 0,18  | 0,58  | 0,13  | N/A   | N/A | N/A | N/A |
| 1971         | -2,39 | -0,23 | -1,35 | -1,3  | -2,18 | -1,05 | -0,95 | -0,71 | N/A   | N/A | N/A | N/A |
| 1972         | 1,83  | 0,08  | 0,59  | 0,54  | 1,13  | 0,9   | 0,21  | 0,23  | N/A   | N/A | N/A | N/A |
| 1973         | -1,41 | -1,33 | -0,67 | -0,8  | -0,74 | -1,14 | -1,14 | -0,61 | N/A   | N/A | N/A | N/A |
| 1974         | 0,89  | 1,03  | 0,64  | 0,52  | 0,34  | 0,3   | 1,01  | 0,67  | N/A   | N/A | N/A | N/A |
| 1975         | -0,14 | -0,26 | -0,63 | -0,55 | 0,19  | 0,39  | -0,23 | -0,06 | N/A   | N/A | N/A | N/A |
| 1976         | 0,37  | 0,66  | -0,07 | -0,03 | 0,18  | -0,78 | 0,1   | 0,35  | N/A   | N/A | N/A | N/A |
| 1977         | -0,59 | -0,74 | -0,3  | -0,57 | 0,15  | -0,98 | 0,58  | 0,23  | N/A   | N/A | N/A | N/A |
| 1978         | -2,06 | -2,07 | -1,38 | -1,08 | -1,1  | -1,79 | -0,74 | -0,88 | N/A   | N/A | N/A | N/A |
| 1979         | 1,31  | 0,82  | 1,99  | -0,15 | 0,82  | 0,54  | 1,15  | 1,1   | N/A   | N/A | N/A | N/A |
| 1980         | -0,3  | -0,08 | -0,23 | 0,9   | 0,06  | 0,26  | 0,3   | 0,31  | N/A   | N/A | N/A | N/A |
| 1981         | 0,3   | -0,1  | -0,14 | -0,18 | -0,65 | -0,5  | 0,74  | 0,51  | N/A   | N/A | N/A | N/A |
| 1982         | -0,9  | -0,44 | -0,8  | -1,44 | -0,86 | -0,62 | -0,31 | -0,41 | -1,57 | N/A | N/A | N/A |
| 1983         | -0,74 | -0,73 | -0,66 | -1,07 | -1,12 | -0,9  | -0,47 | -0,8  | -1,28 | N/A | N/A | N/A |
| 1984         | 0,32  | -0,09 | 0,81  | 0,17  | -0,23 | 0,11  | 0,34  | 0,57  | -0,05 | N/A | N/A | N/A |
| 1985         | 0,49  | 0,44  | 0,39  | 0,04  | -0,15 | 0,37  | 1,06  | 1,13  | 0,61  | N/A | N/A | N/A |

|      |       |       |       |       |       |       |       |       |       |       |       |       |
|------|-------|-------|-------|-------|-------|-------|-------|-------|-------|-------|-------|-------|
| 1986 | 0,16  | -1,35 | -0,69 | -0,78 | -0,5  | -0,91 | 0,27  | 0,26  | -0,88 | N/A   | N/A   | N/A   |
| 1987 | -0,38 | 0,29  | 0,08  | 0,37  | -0,15 | -0,31 | 1,09  | 0,73  | -0,19 | N/A   | N/A   | N/A   |
| 1988 | 0,22  | -0,24 | 0,17  | 0,47  | 0,28  | -0,6  | 0,07  | -0,16 | 0,51  | N/A   | N/A   | N/A   |
| 1989 | -2,05 | -1,52 | -2,08 | -0,9  | -0,82 | -1,8  | -1,28 | -0,92 | -1,25 | -1,77 | -1,41 | N/A   |
| 1990 | -0,93 | -0,66 | -0,76 | -1,18 | -0,74 | -1,31 | -0,62 | -0,31 | -0,53 | -0,96 | -0,88 | N/A   |
| 1991 | -1,09 | 0,27  | -0,71 | -0,55 | -0,96 | -0,53 | -0,98 | -0,7  | -0,99 | -0,59 | -1,12 | N/A   |
| 1992 | -0,55 | -0,75 | -0,51 | -0,01 | -1,19 | -0,1  | -1,62 | -0,24 | -0,96 | -0,81 | -1,21 | N/A   |
| 1993 | -0,17 | -0,43 | -0,35 | -0,34 | -0,56 | -0,81 | 0,95  | 0,19  | 0,21  | -0,59 | 0,06  | N/A   |
| 1994 | 0,8   | 0,13  | 0,57  | 0,3   | 0,59  | 0,32  | 0,01  | 0,54  | 1,32  | -0,58 | -0,91 | N/A   |
| 1995 | 0,63  | 2,26  | 0,66  | 1     | 0,51  | 1,68  | 0,56  | 1     | 0,48  | 1,11  | 0,27  | N/A   |
| 1996 | 0,56  | 0,34  | 1,07  | 0,54  | 0,87  | 1,31  | 0,63  | 0,64  | 1,36  | 1,32  | 0,65  | N/A   |
| 1997 | -0,98 | -0,54 | -0,09 | -0,57 | -0,29 | 0,26  | 0,58  | 0,73  | -0,36 | 0,25  | 0,83  | 0,16  |
| 1998 | -0,24 | -0,13 | -0,31 | 0,7   | 0,16  | -0,1  | 0,32  | 0,81  | -0,32 | -0,14 | 0,39  | 0,41  |
| 1999 | -0,2  | 0,54  | 0,91  | 0,99  | 1     | 1,71  | 0,73  | 0,06  | 0,43  | 0,3   | 0,39  | 0,71  |
| 2000 | -0,47 | -0,42 | -1    | -0,96 | -1,1  | -0,29 | 0,22  | 0,17  | -0,79 | -0,54 | 0,51  | -0,28 |
| 2001 | -0,12 | -0,68 | -0,73 | -0,29 | -0,48 | -0,52 | 0,36  | 0,51  | -0,26 | -0,4  | 0,65  | 0,15  |
| 2002 | 1,27  | 0,49  | 0,96  | 0,78  | 0,89  | 0,54  | 0,7   | 1,51  | 0,9   | 1,39  | 0,21  | 1     |
| 2003 | -1,94 | -2,81 | -1,9  | -2,25 | -1,7  | -2,43 | -1,35 | -1,26 | -2,12 | -2,49 | -2,05 | -1,62 |
| 2004 | 0,2   | -0,34 | -0,45 | 0,63  | -0,11 | 0,09  | 0,3   | -1,44 | 0,04  | -0,34 | 0,15  | -0,21 |
| 2005 | 0,52  | -0,21 | 0,93  | 0,74  | 1,94  | 0,99  | 0,22  | -1,4  | 0,53  | 0,85  | 1,04  | 0,7   |
| 2006 | 0,25  | 0,12  | -0,06 | -0,12 | 0,43  | 0,15  | 0,46  | -0,43 | -0,49 | 0,43  | 1,01  | 0,85  |
| 2007 | 0,16  | 0,29  | 1,33  | 0,29  | 0,54  | 0,66  | -0,03 | -1,59 | 0,55  | 0,28  | 0,55  | 0,07  |
| 2008 | 0,34  | 0,37  | 0,1   | -0,02 | 0,41  | 0,63  | -0,68 | 0,56  | 0,06  | 0,07  | -0,3  | -0,3  |
| 2009 | 0,79  | 0,22  | 0,34  | 0,32  | 1,04  | 1,11  | 1,32  | 1,8   | 0,39  | 1,28  | 1,41  | 0,78  |
| 2010 | 2,86  | 2,06  | 2,74  | 3,3   | 3,2   | 2,86  | 2,13  | 2,2   | 2,73  | 2,57  | 2,78  | 2,38  |
| 2011 | -0,6  | -1,01 | -1,54 | -2,36 | -1,29 | -1,25 | -0,58 | 0,16  | -1,17 | 0,41  | -0,49 | -0,65 |
| 2012 | -0,69 | -0,02 | -1,05 | -1,05 | -0,1  | -0,4  | -0,21 | -0,62 | -0,84 | -0,99 | -0,51 | -1,26 |
| 2013 | 0,53  | 1,18  | 1,21  | 1,23  | 1,53  | 1,39  | 0,89  | 0,9   | 0,75  | 0,8   | 0,91  | 0,25  |
| 2014 | 0,94  | 1,64  | 1,67  | 1,24  | 1,64  | 0,78  | 0,03  | N/A   | 1,36  | 0,63  | -0,08 | 1,18  |
| 2015 | -0,04 | -0,81 | -0,39 | 0,11  | -0,97 | -0,13 | N/A   | N/A   | -0,4  | -0,23 | -1,09 | -0,96 |
| 2016 | 0,85  | -0,18 | 1,92  | 1,88  | 1,59  | 0,34  | N/A   | N/A   | 1,89  | -0,07 | -0,9  | -0,8  |
| 2017 | -1,12 | -1,94 | -0,71 | 0,09  | -0,08 | -1,04 | N/A   | -0,14 | -0,73 | -1,02 | -0,87 | -0,78 |
| 2018 | 0,1   | 0,38  | 0,92  | 0,36  | 0,34  | -0,19 | N/A   | -0,31 | -0,03 | -0,72 | N/A   | -1,71 |
| 2019 | 0,38  | -0,47 | 0,19  | 0,3   | -2,11 | 0,28  | N/A   | 0,84  | 1,08  | 0,57  | N/A   | 0,44  |

Legend:  moderately dry;  severely dry;  extremely dry
